# Supplementary material
Source: Springer Nature journal article supplement (https://publikationen.ub.uni-frankfurt.de/files/23509/12934_2012_667_MOESM4_ESM.PDF)

*PHO12*

*RDL1*

S C S C

S C S C

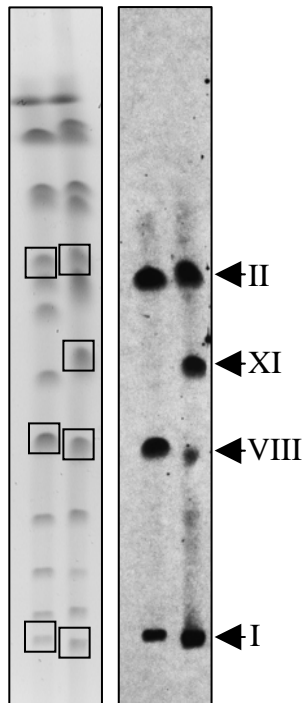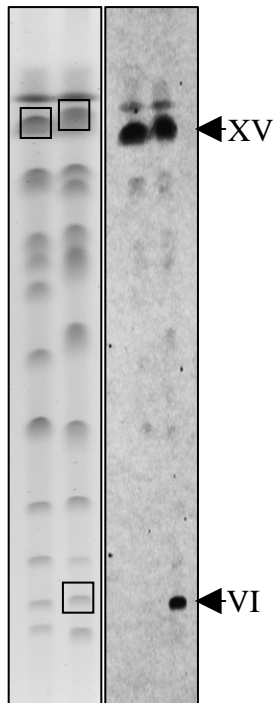

Supplement: MOESM4 [file 12934_2012_667_MOESM4_ESM.PDF]
